# Supplementary material for: The impact of the COVID-19 pandemic on gastrointestinal infection trends in England, February – July 2020
Source: bioRxiv or medRxiv preprint supplement (doi:10.1101/2021.04.06.21254174), 2021-04-08

**Supplementary Figures**

**Supplementary Table 1 – Gastrointestinal outbreaks and GI pathogens<sup>‡</sup> reported to Public Health England between Week 1 and Week 31 2020 and the 5-year weekly average (95% confidence interval), by COVID-19 outbreak Phase**

|                                   |                         | Phase            | 1                  | 2                | 3                | 4                | 5                | 6                | 7              |
|-----------------------------------|-------------------------|------------------|--------------------|------------------|------------------|------------------|------------------|------------------|----------------|
|                                   |                         | Week             | 1-4                | 5-9              | 10-12            | 13-18            | 19-22            | 23-27            | 28-31          |
|                                   |                         |                  | Pre-outbreak phase | Early outbreak   | Pre-lockdown     | Early Lockdown   | Late Lockdown    | Lockdown Easing  | Further Easing |
| Gastrointestinal outbreaks        | 2020                    | 465              | 510                | 273              | 109              | 46               | 50               | 91               |                |
|                                   | 2019                    | 545              | 684                | 383              | 752              | 443              | 326              | 314              |                |
|                                   | 5 year average (95% CI) | 489 (444 - 534)  | 651 (605 - 697)    | 454 (357 - 551)  | 667 (554 - 780)  | 350 (294 - 406)  | 292 (226 - 358)  | 305 (273 - 337)  |                |
|                                   | % Change                | -5%              | -22%               | -40%             | -84%             | -87%             | -83%             | -70%             |                |
| Viral outbreaks                   | 2020                    | 390              | 441                | 224              | 80               | 27               | 36               | 54               |                |
|                                   | 5-year average (95% CI) | 417 (377-457)    | 558 (512-604)      | 391 (305-477)    | 555 (449-660)    | 281 (239-324)    | 225 (174-276)    | 229 (203-256)    |                |
| Bacterial outbreaks               | 2020                    | 9                | 9                  | 4                | 8                | 9                | 7                | 14               |                |
|                                   | 5-year average (95% CI) | 11 (7-14)        | 12 (8-15)          | 7 (4-10)         | 18 (16-19)       | 18 (14-22)       | 18 (15-22)       | 24 (20-27)       |                |
| Parasitic outbreaks               | 2020                    | 2                | 1                  | 0                | 1                | 0                | 0                | 0                |                |
|                                   | 5-year average (95% CI) | 4 (2-5)          | 3 (1-6)            | 4 (2-5)          | 12 (9-14)        | 7 (5-10)         | 3 (2-5)          | 3 (2-4)          |                |
| Care home Setting                 | 2020                    | 301              | 318                | 169              | 98               | 30               | 37               | 55               |                |
|                                   | 5-year average (95% CI) | 324 (283-364)    | 402 (355-448)      | 273 (216-329)    | 429 (360-497)    | 205 (167-243)    | 156 (121-190)    | 167 (153-182)    |                |
| Healthcare Setting                | 2020                    | 54               | 45                 | 34               | 3                | 1                | 4                | 7                |                |
|                                   | 5-year average (95% CI) | 62 (51-73)       | 89 (75-103)        | 55 (29-80)       | 85 (54-116)      | 32 (24-40)       | 28 (18-38)       | 25 (21-29)       |                |
| Educational Setting               | 2020                    | 58               | 102                | 53               | 0                | 2                | 3                | 10               |                |
|                                   | 5-year average (95% CI) | 66 (45-87)       | 107 (85-130)       | 86 (70-102)      | 77 (57-98)       | 62 (51-73)       | 61 (37-84)       | 51 (39-64)       |                |
| Food outlet Setting               | 2020                    | 29               | 14                 | 3                | 1                | 1                | 1                | 6                |                |
|                                   | 5-year average (95% CI) | 10 (8-12)        | 18 (11-25)         | 13 (9-17)        | 23 (16-30)       | 14 (10-17)       | 8 (6-11)         | 13 (9-17)        |                |
| Custodial Setting                 | 2020                    | 6                | 28                 | 1                | 0                | 0                | 1                | 1                |                |
|                                   | 5-year average (95% CI) | 2 (1-3)          | 2 (0-3)            | 2 (1-3)          | 3 (1-4)          | 2 (0-3)          | 1 (1-2)          | 3 (2-5)          |                |
| Other Settings                    | 2020                    | 17               | 28                 | 13               | 7                | 12               | 4                | 12               |                |
|                                   | 5-year average (95% CI) | 25 (19-32)       | 34 (27-41)         | 25 (20-31)       | 51 (44-57)       | 36 (31-41)       | 38 (34-42)       | 45 (40-50)       |                |
| Laboratory confirmed GI organisms | 2020                    | 6023             | 7374               | 3520             | 2859             | 3284             | 4617             | 6205             |                |
|                                   | 2019                    | 5041             | 6499               | 4180             | 8561             | 6967             | 8117             | 9877             |                |
|                                   | 5 year average (95% CI) | 5016 (4721-5311) | 6471 (5969-6973)   | 3943 (3591-4295) | 8345 (7602-9088) | 6553 (5829-7277) | 7879 (7539-8219) | 9303 (8746-9860) |                |
|                                   | % Change                | 20%              | 14%                | -11%             | -66%             | -50%             | -41%             | -33%             |                |

<sup>‡</sup> Organisms: Campylobacter, STEC O157, STEC Non-O157, Listeria, non-typhoidal Salmonella, typhoidal Salmonella, Shigella, Norovirus, Cryptosporidium and Giardia

**Supplementary Figure 1 – Laboratory confirmed GI pathogens reported to Public Health England between Week 1 and Week 31 2020 and the 5-year weekly average, by age group and sex**

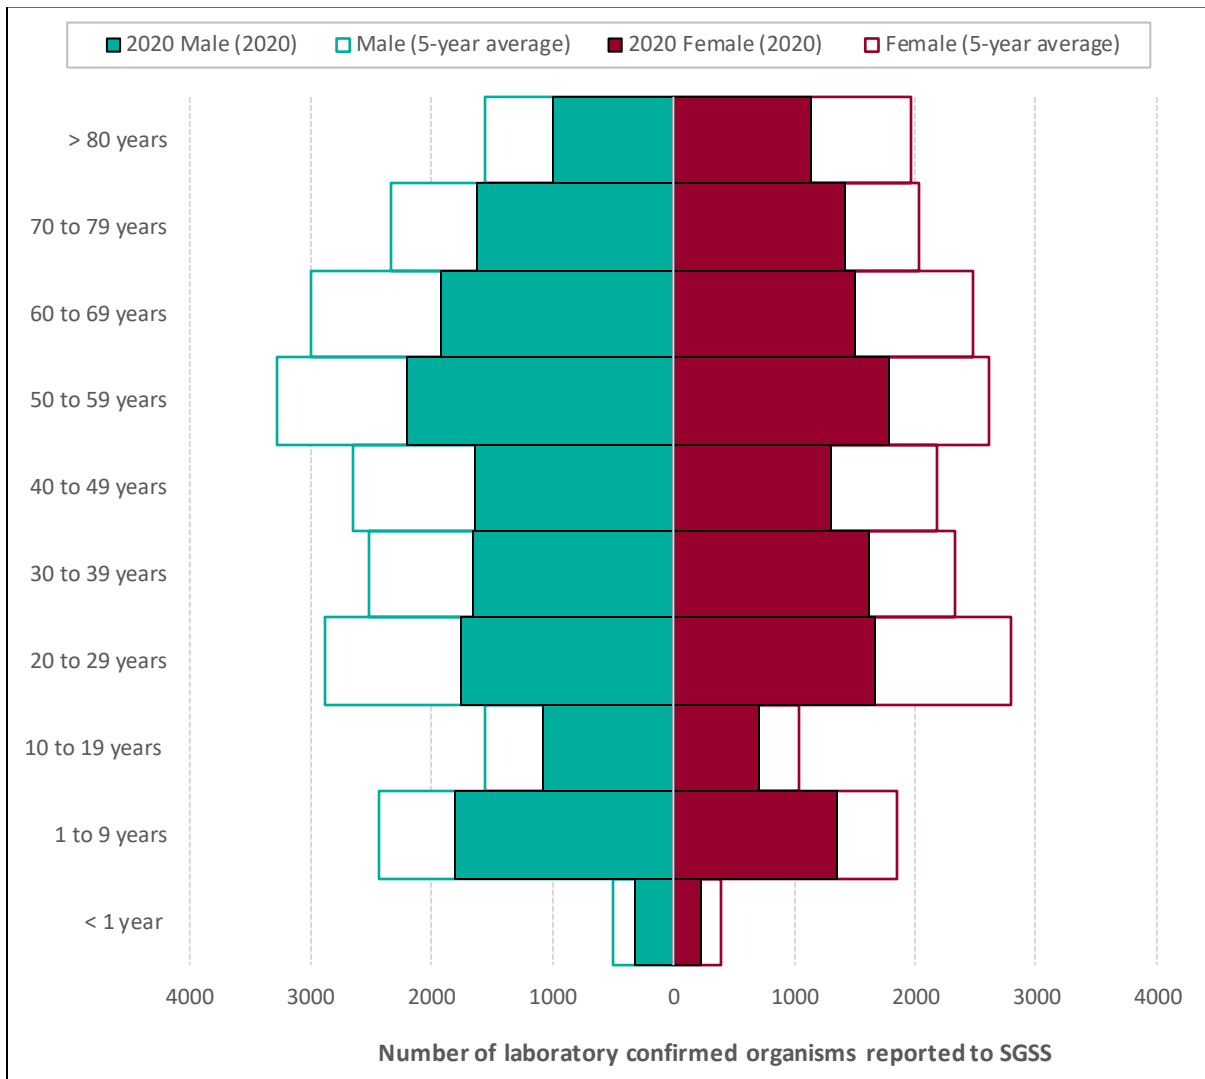

**Supplementary Figure 2 – Laboratory confirmed GI pathogens reported between Week 1 and Week 31 2020 and 5-year weekly average, by COVID-19 outbreak Phase and PHE region**

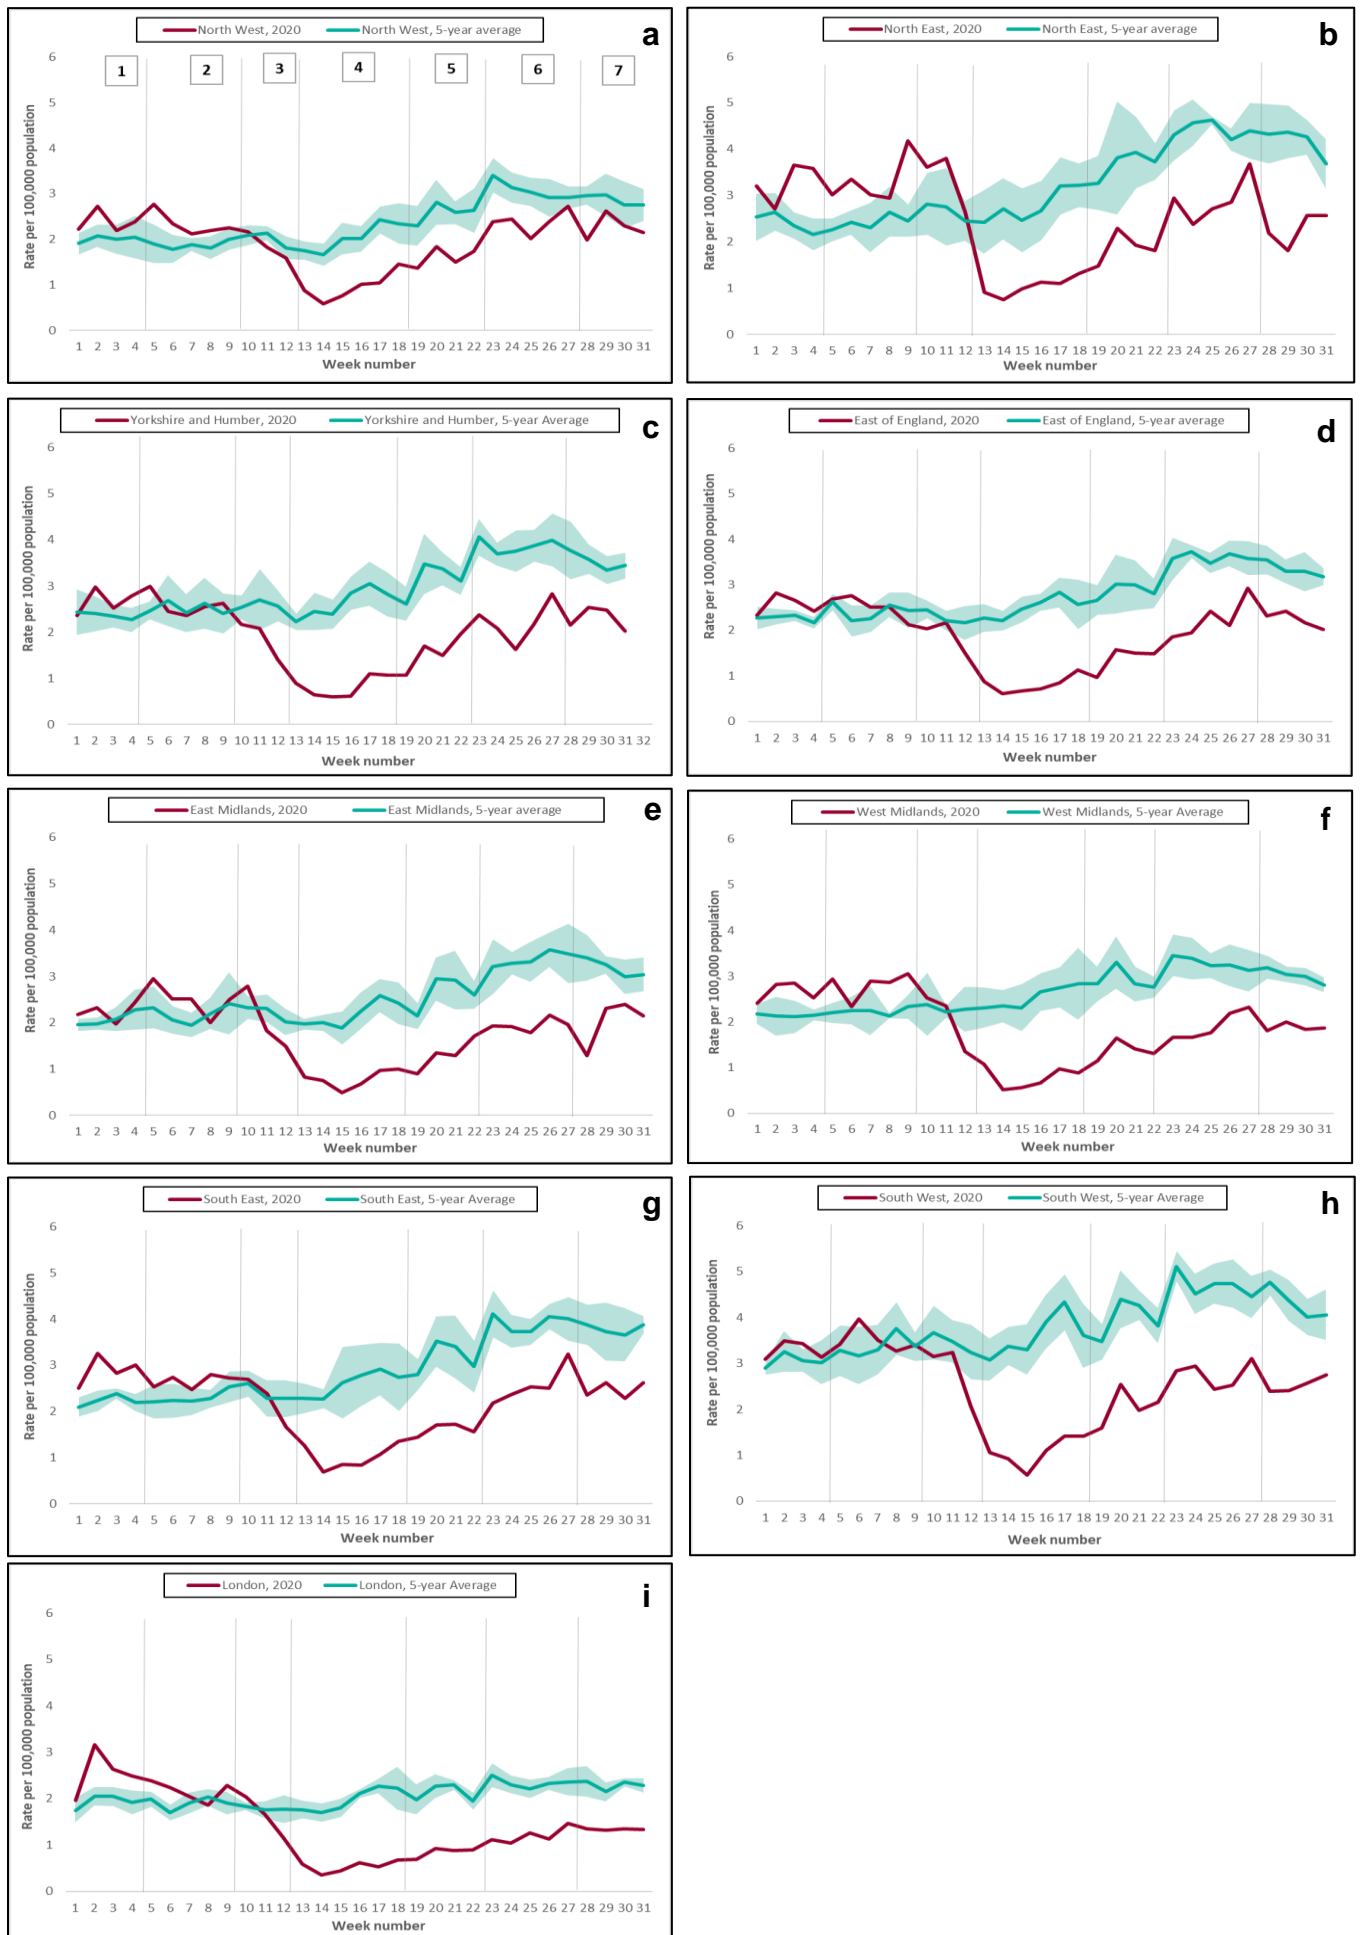

**Supplementary Figure 3 – Correlation between cumulative laboratory confirmed GI diagnoses (percentage relative effect between 2020 and the 5-year average) and cumulative COVID-19 rate for English Upper Tier Local Authorities\*, Phase 2 to Phase 7 of the COVID response**

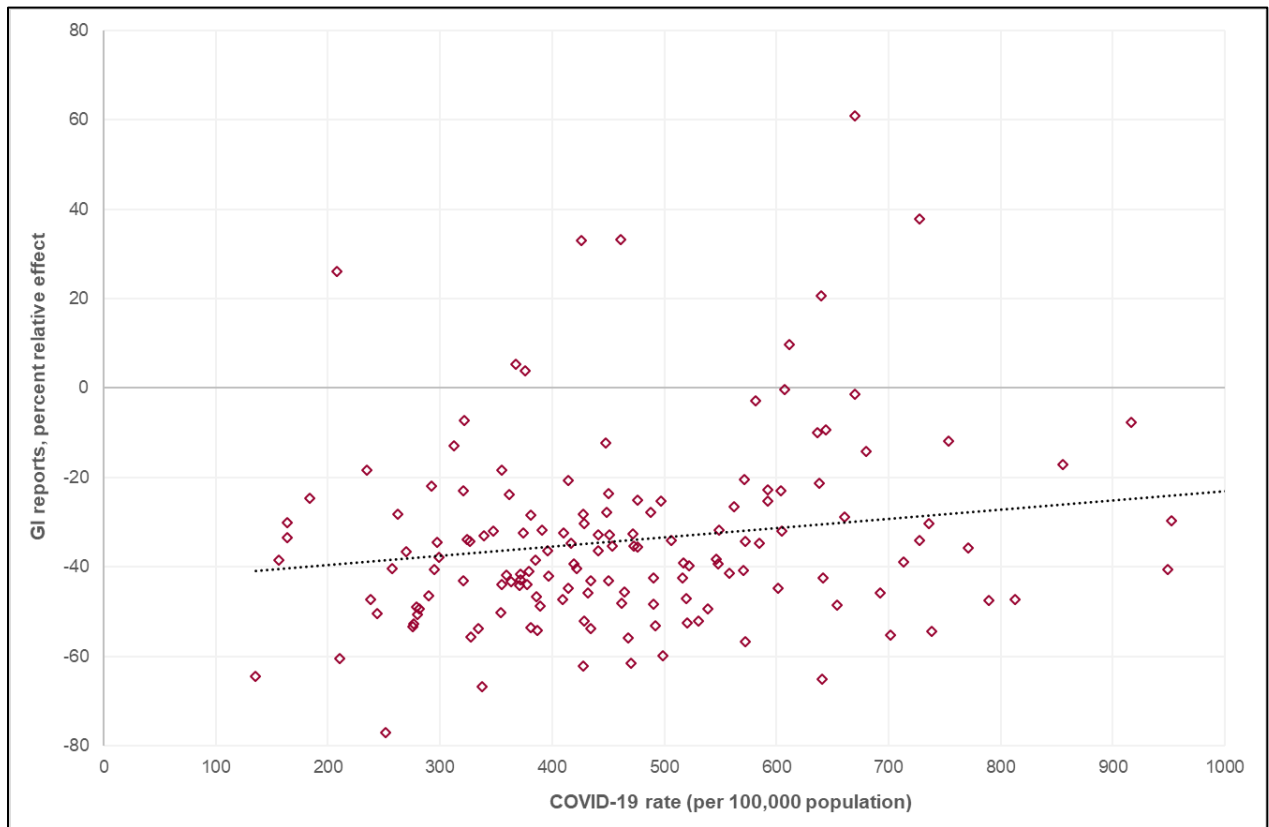

\*Graph excludes the Leicester Upper Tier Local Authority due to higher cumulative COVID-19 rate than other local authority areas up to 02 August 2020. Leicester was included in the Pearson's correlation analysis.

**Supplementary Figure 4 – Daily number of total attendances with a diagnostic code recorded across the Emergency Department Syndromic Surveillance network indicating the seven-day moving average, Phase 1 – 7 of the COVID-19 outbreak response, 2019 and 2020.**

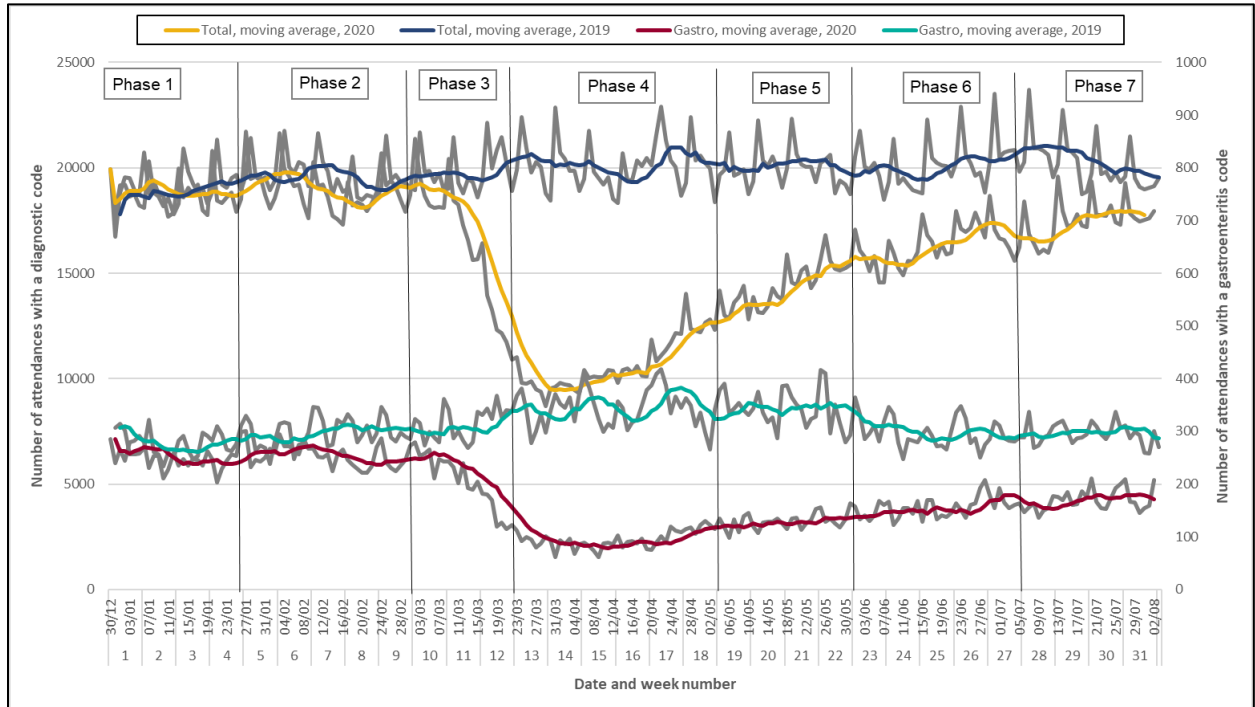

**Supplementary Figure 5 -GP in hours average daily rate by week per 100,000 population for gastroenteritis consultations, COVID-19 outbreak Phase and age group, (a) 2019 and (b) 2020**

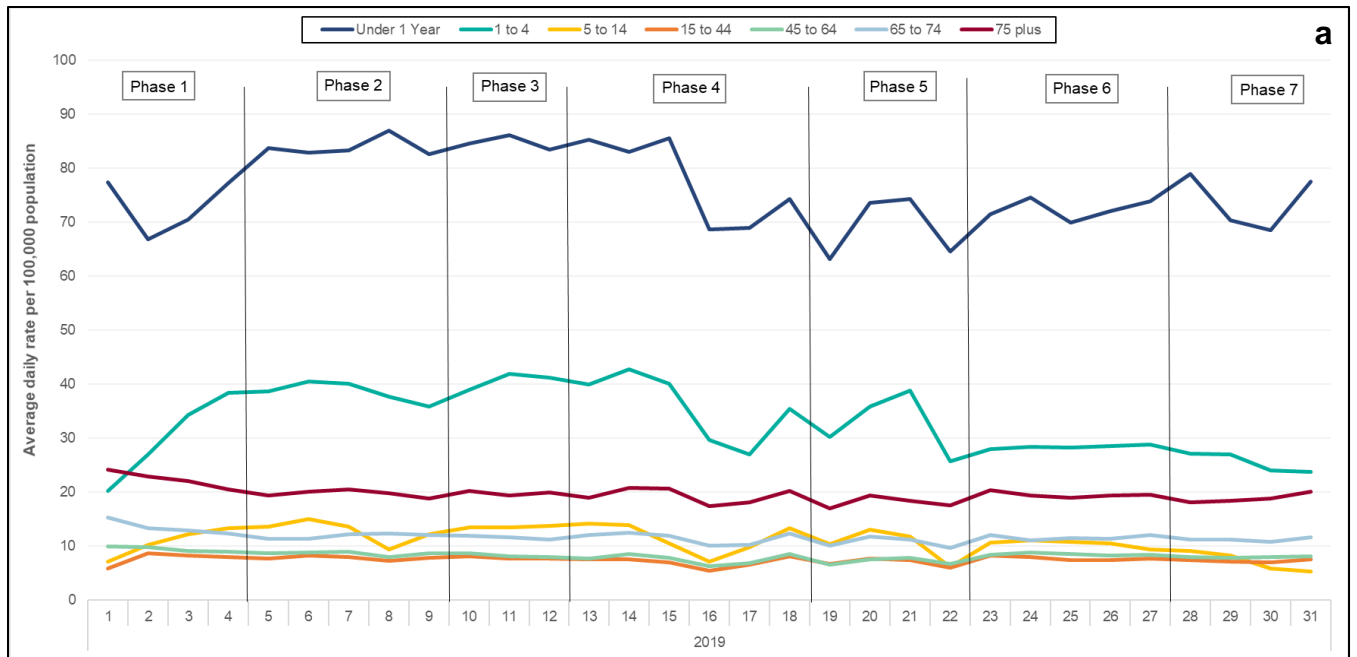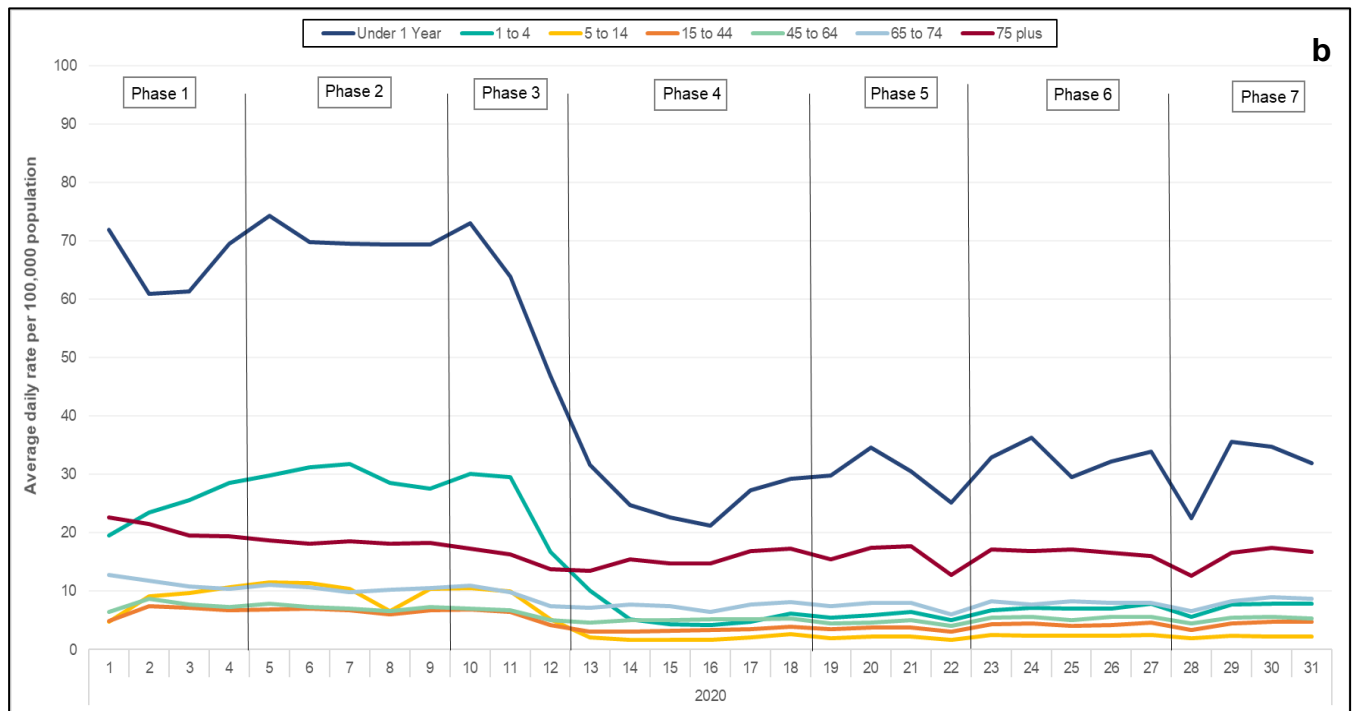

**Supplementary Figure 6 - GP in hours average daily rate by week per 100,000 population for gastroenteritis consultations, COVID-19 outbreak Phase and PHE region, 2019 and 2020**

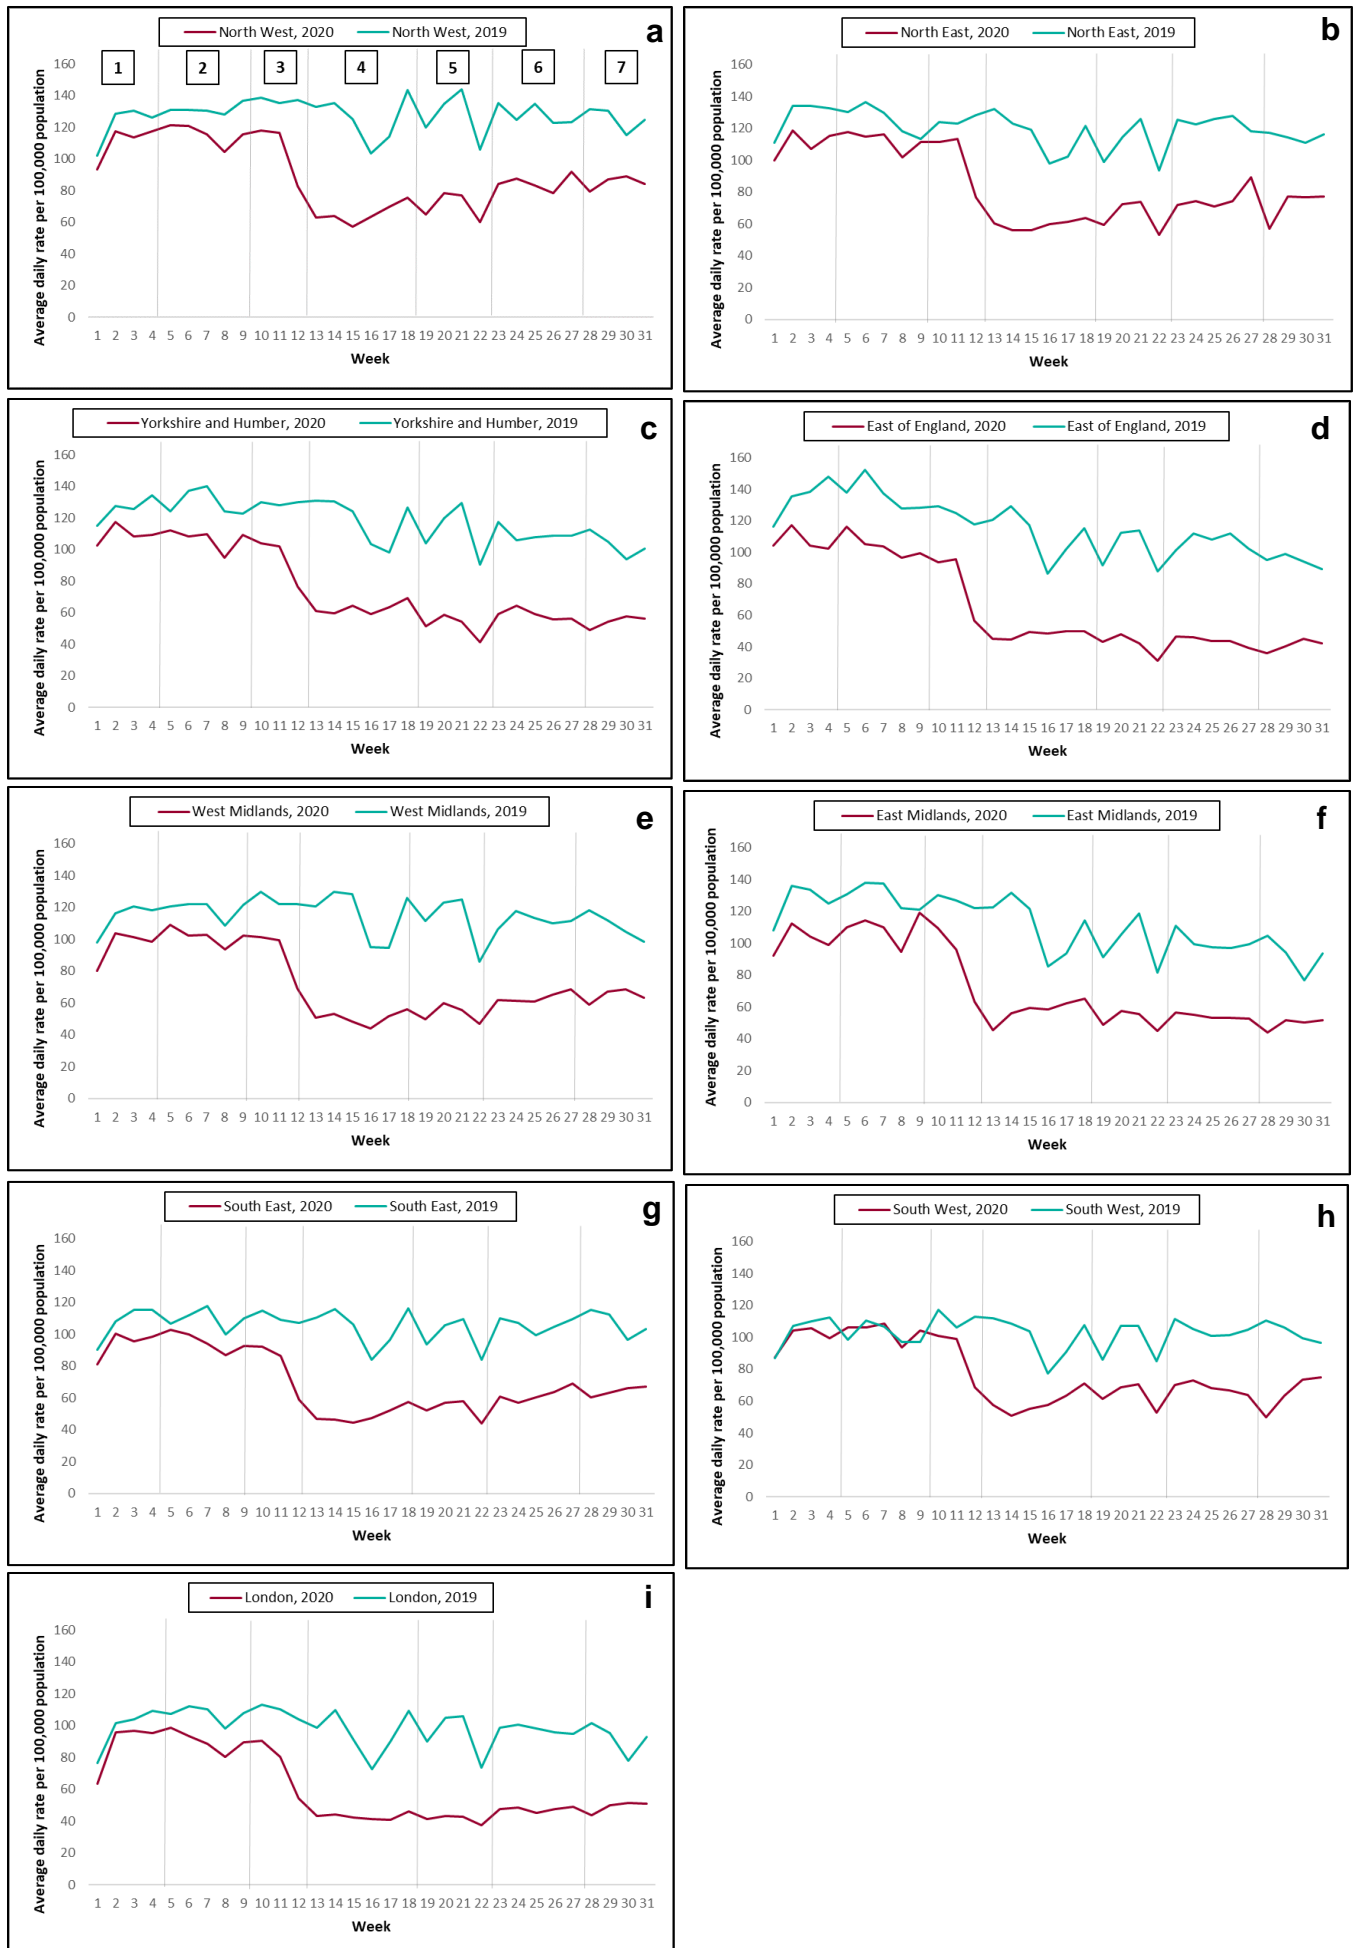



**Supplementary Figure 7 – Daily GP-in hours incidence rate and 7-day moving average (adjusted for weekends and bank holidays) per 100,00 population for (a) vomiting and (b) diarrhoea and daily calls as a percentage of total calls and moving 7-day average for (c) ‘Diarrhoea’ calls and (d) ‘Vomiting’ calls**

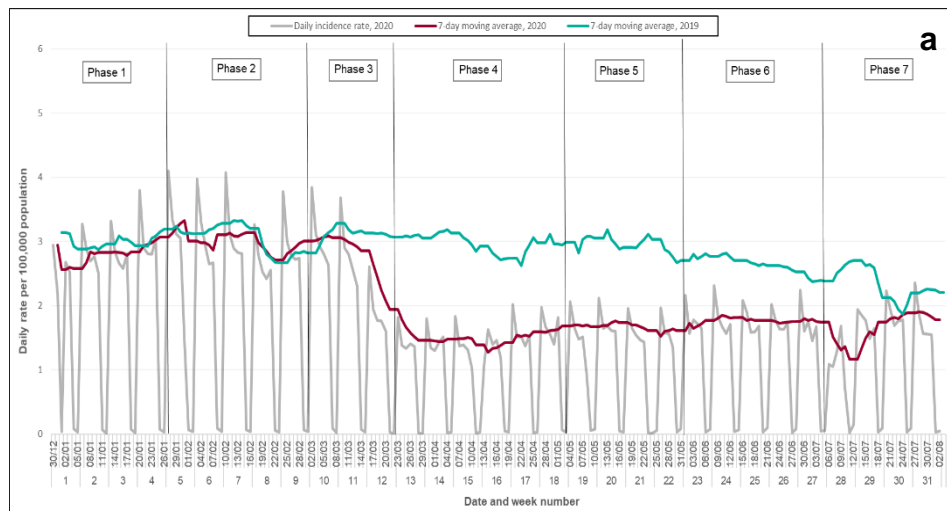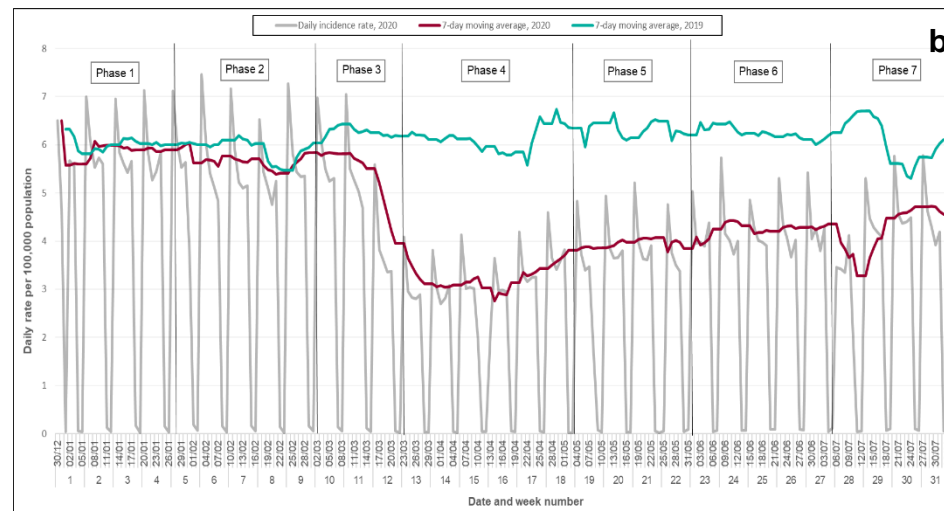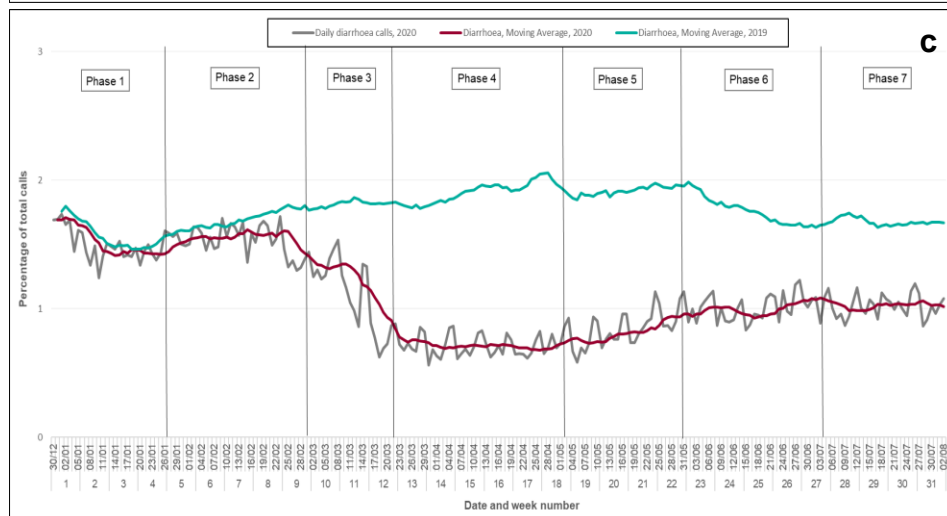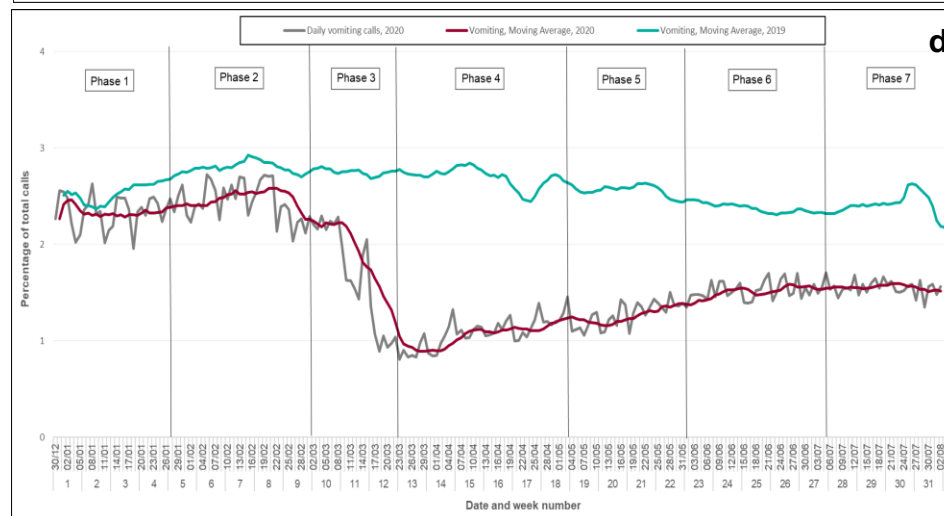

**Supplementary Figure 8 – Google trend searches between 01/01/2017 and 02/08/2020 for (a) protective factors associated with GI illness and (b) key search phrases associated with GI illness, indicating the seven Phases of the COVID-19 response**

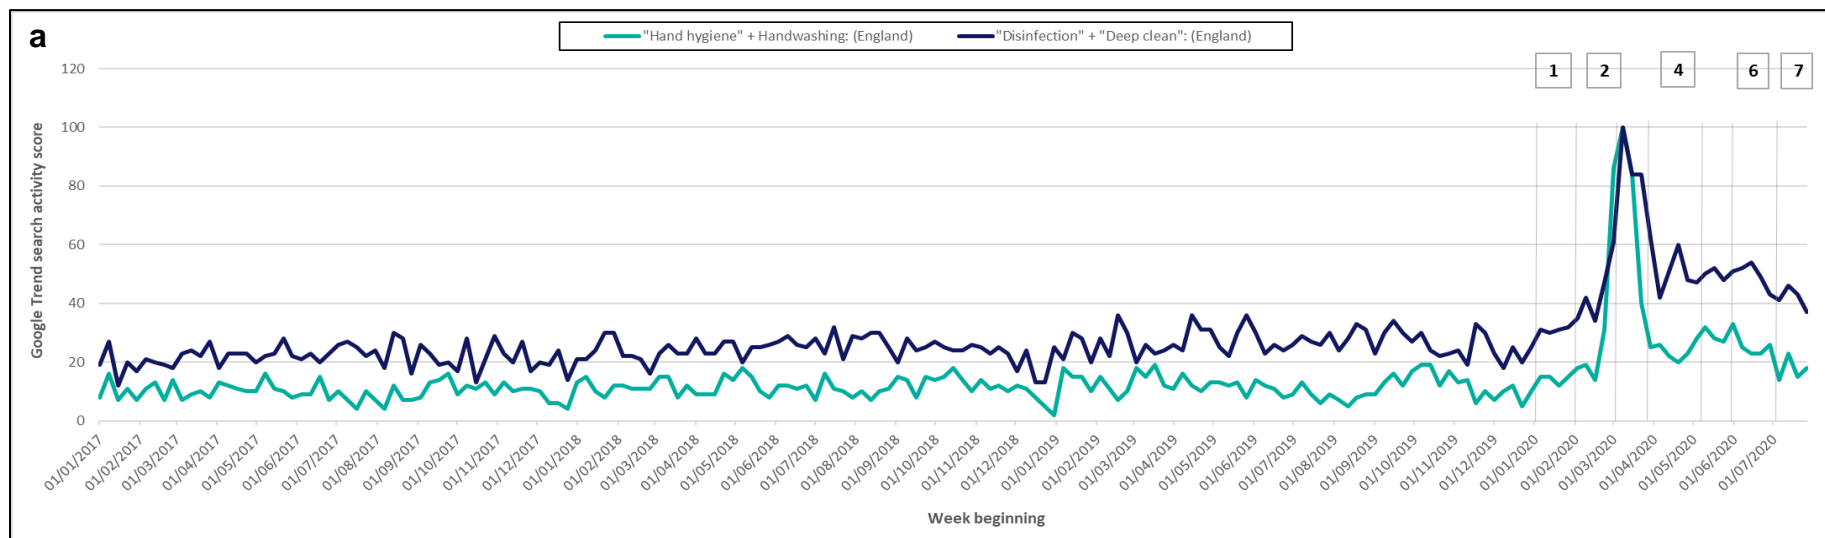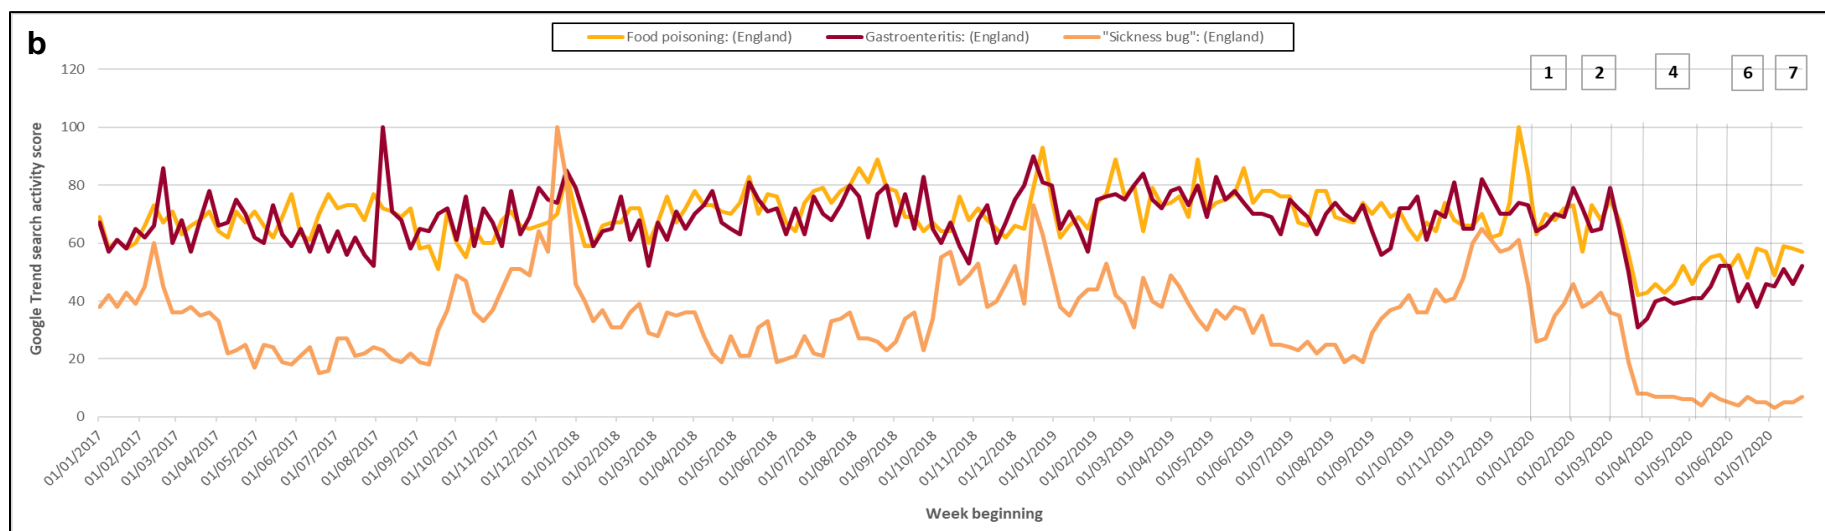

Supplement: Supplementary file [file media-1.pdf]
